# Supplementary material for: First heterometallic GaIII–DyIII single-molecule magnets: implication of GaIII in extracting Fe–Dy interaction
Source: Royal Society of Chemistry journal article supplement (doi:10.1039/c6dt01364c), 2016-01-01
Supplement: c6dt01364c1.pdf [file c6dt01364c1.pdf]

# First heterometallic Ga<sup>III</sup>-Dy<sup>III</sup> single-molecule magnets: Implication of Ga<sup>III</sup> in extracting Fe-Dy interaction

Sihuai Chen,<sup>\*a,b</sup> Valeriu Mereacre,<sup>\*a</sup> Christopher E. Anson<sup>a</sup> and Annie K. Powell<sup>\*a,c</sup>

<sup>a</sup>Institute of Inorganic Chemistry, Karlsruhe Institute of Technology, Engesserstrasse 15, 76131 Karlsruhe, Germany. E-mail: valeriu.mereacre@kit.edu, annie.powell@kit.edu

<sup>b</sup>State Key Laboratory of Structural Chemistry, Fujian Institute of Research on the Structure of Matter, Chinese Academy of Sciences, Fuzhou, Fujian 350002, China. E-mail: chensihuai@fjirsm.ac.cn

<sup>c</sup>Institute of Nanotechnology, Karlsruhe Institute of Technology, Hermann-von-Helmholtz Platz 1, 76344 Eggenstein-Leopoldshafen, Germany.

## Supporting Information

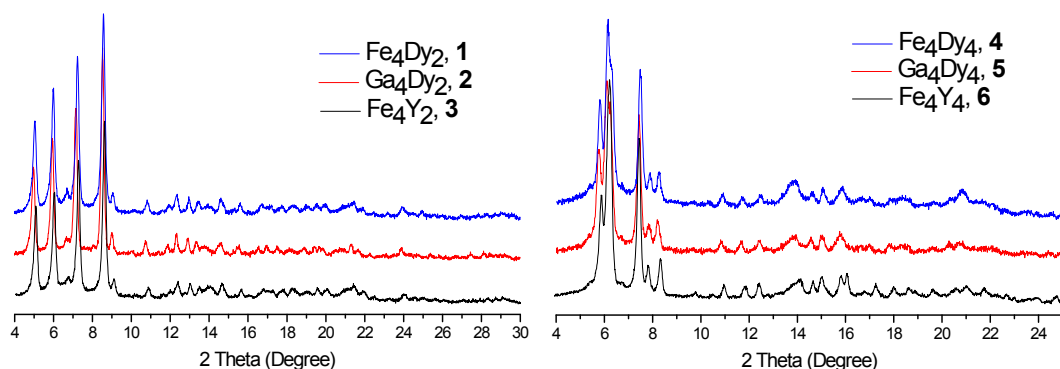

Fig. S1 X-ray powder diffraction patterns for compounds 1-3 (left) and 4-6 (right).

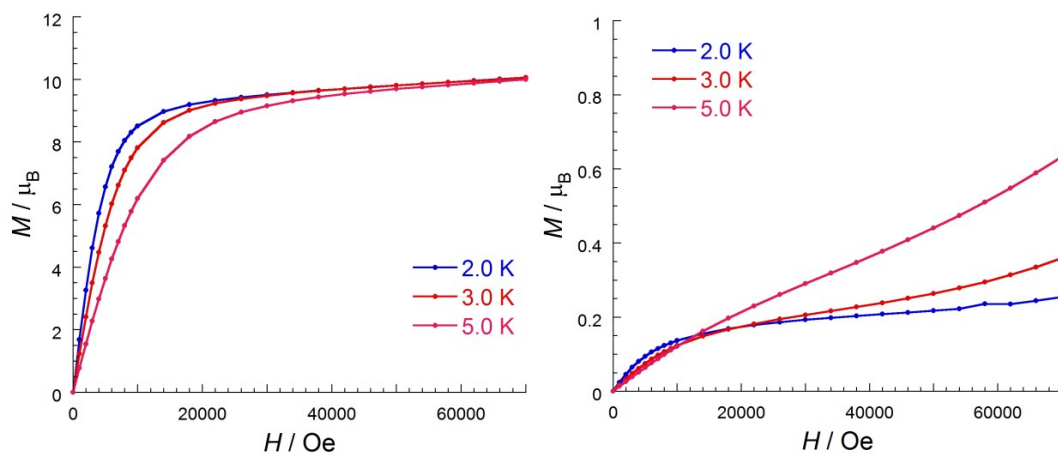

Fig. S2 Field dependence of the magnetization at different temperatures for compounds 2 (left) and 3 (right).

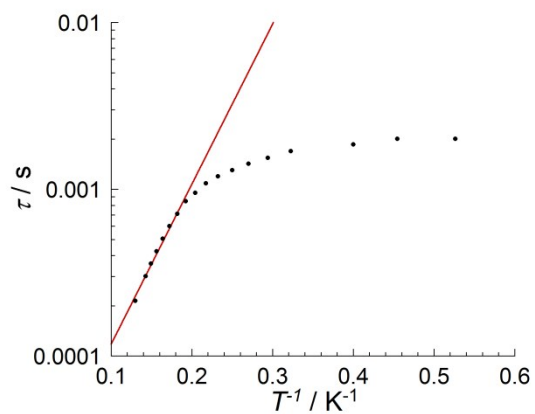

**Fig. S3** Arrhenius plot using ac data under zero dc field for compound **2**.

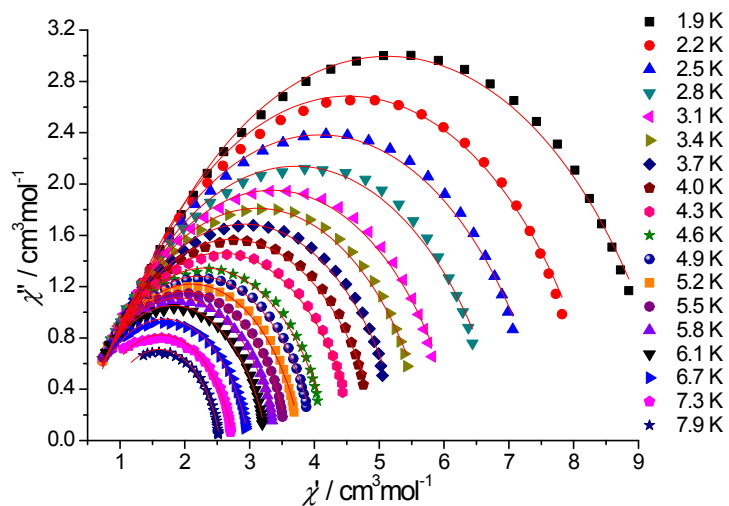

**Fig. S4** Cole-Cole plots under zero dc field for compound **2**.

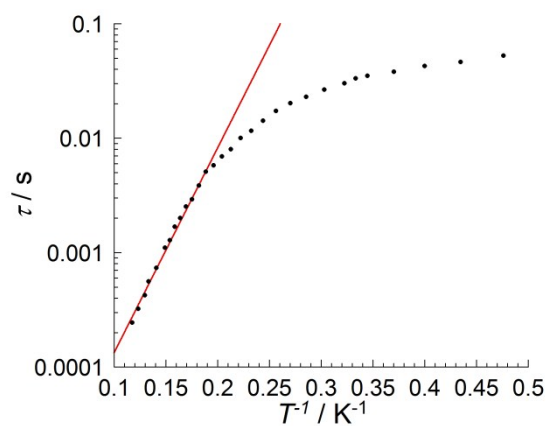

**Fig. S5** Arrhenius plot using ac data under 1500 Oe dc field for compound **2**.

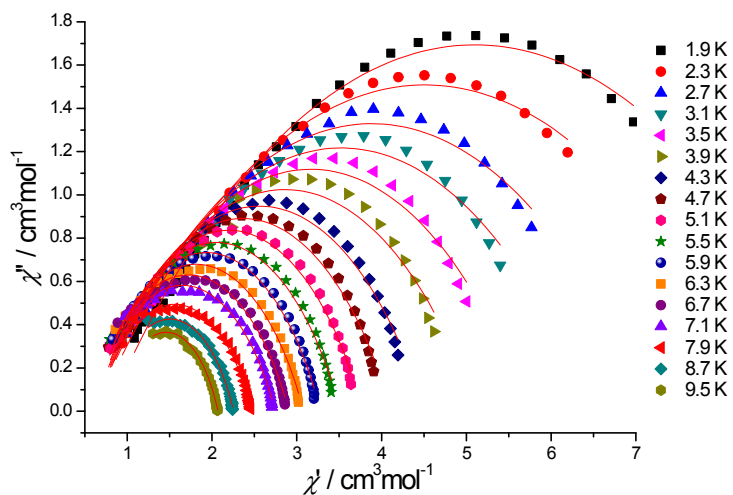

**Fig. S6** Cole-Cole plots under 1500 Oe dc field for compound 2.

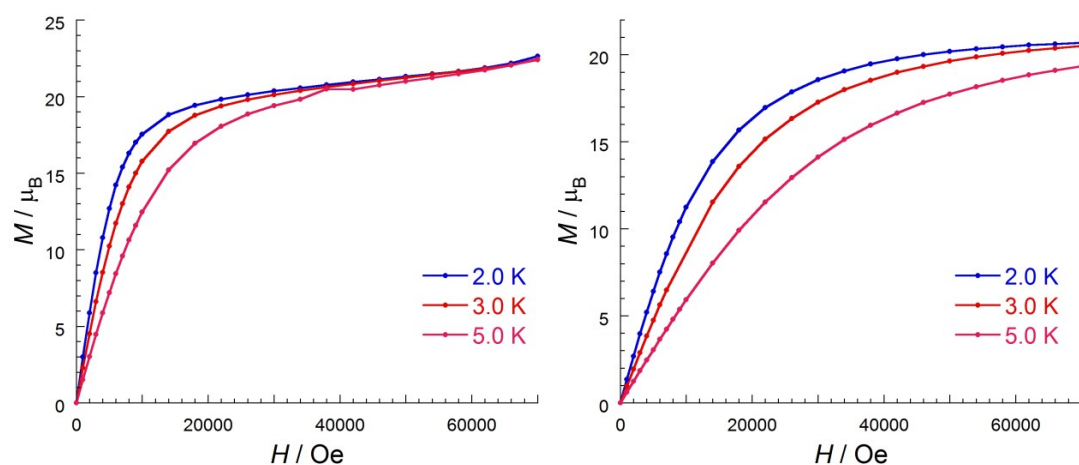

**Fig. S7** Field dependence of the magnetization at different temperatures for compounds 5 (left) and 6 (right).

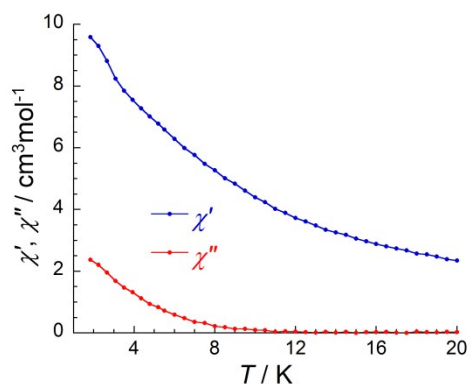

**Fig. S8** Temperature dependence of the in-phase ( $\chi'$ ) (blue) and out-of-phase ( $\chi''$ ) (red) ac susceptibility components at 1000 Hz under zero dc field for 5.

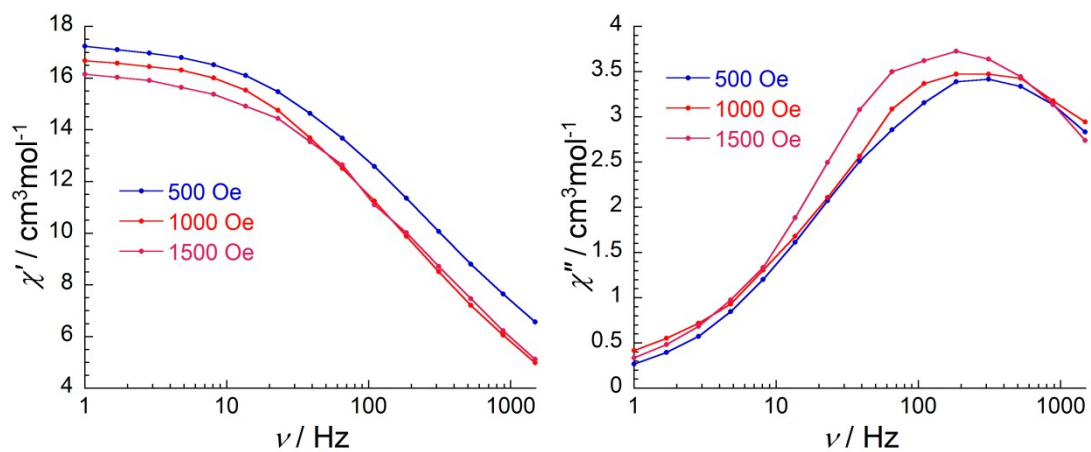

**Fig. S9** Frequency dependence of the in-phase ( $\chi'$ ) (left) and out-of-phase ( $\chi''$ ) (right) ac susceptibility components under the indicated dc fields at 1.8 K for **5**.

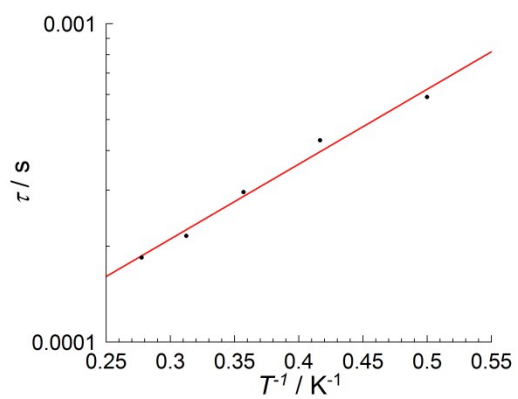

**Fig. S10** Arrhenius plot using ac data under 1000 Oe dc field for compound **5**.
